# Supplementary material
Source: PubMed Central journal article supplement (PMC6646556)
Supplement: ao8b02419_si_002.pdf [file ao8b02419_si_002.pdf]

# **Combining Ensemble Learning with a Fragment-Based Topological Approach to Generate New Molecular Diversity in Drug Discovery: In Silico Design of Hsp90 Inhibitors**

Alejandro Speck-Planche<sup>a\*</sup>

<sup>a</sup>Research Program on Biomedical Informatics (GRIB), Hospital del Mar Medical Research Institute (IMIM), 08003, Barcelona, Spain

**CONTACT:** Alejandro Speck-Planche ([alejspivanovich@yahoo.es](mailto:alejspivanovich@yahoo.es))

**Phone:** +34 678042076

**Table S1.** Local measures of the statistical quality and performance of the mt-QSAR-EL model.

| $\mathbf{b}_t$ | $\mathbf{N}_{\text{Total}}(\mathbf{b}_t)$ | $\mathbf{N}_{\text{Active}}(\mathbf{b}_t)$ | $\mathbf{N}_{\text{Inactive}}(\mathbf{b}_t)$ | $[\mathbf{Sn}(\%)]_{\mathbf{b}_t}$ | $[\mathbf{Sp}(\%)]_{\mathbf{b}_t}$ | Series       |
|----------------|-------------------------------------------|--------------------------------------------|----------------------------------------------|------------------------------------|------------------------------------|--------------|
| Hsp90 $\alpha$ | 486                                       | 252                                        | 234                                          | 85.32%                             | 75.21%                             | Training Set |
| Hsp90 $\beta$  | 288                                       | 121                                        | 167                                          | 80.17%                             | 92.81%                             | Training Set |
| Hsp90 $\alpha$ | 161                                       | 83                                         | 78                                           | 89.16%                             | 76.92%                             | Test Set     |
| Hsp90 $\beta$  | 94                                        | 38                                         | 56                                           | 78.95%                             | 87.50%                             | Test Set     |

**The symbols in this table have the following meanings:**

$\mathbf{b}_t$  refers to the biological target (Hsp90 isoform). Therefore, Hsp90 $\alpha$  is the heat shock protein 90 alpha, while Hsp90 $\beta$  is the heat shock protein 90 beta.

$\mathbf{N}_{\text{Total}}(\mathbf{b}_t)$  – total number of molecules depending on the target.

$\mathbf{N}_{\text{Active}}(\mathbf{b}_t)$  – number of active molecules depending on the target.

$\mathbf{N}_{\text{Inactive}}(\mathbf{b}_t)$  – number of inactive molecules depending on the target.

$[\mathbf{Sn}(\%)]_{\mathbf{b}_t}$  – Local sensitivity expressed as the percentage of molecules correctly classified as active depending on the target.

$[\mathbf{Sp}(\%)]_{\mathbf{b}_t}$  – Local specificity expressed as the percentage of molecules correctly classified as inactive depending on the target.
